# Supplementary material for: MDA5 is an essential vita-PAMP sensor necessary for host resistance against Aspergillus fumigatus
Source: bioRxiv or medRxiv preprint supplement (doi:10.1101/2020.07.06.182154), 2020-09-23
Supplement: Supplementary file [file media-1.pdf]

**SUPPLEMENTAL MATERIALS FOR:**

**Mda5 is an essential vita-PAMP sensor necessary for host  
resistance against *Aspergillus fumigatus***

Xi Wang, Alayna K. Caffrey-Carr, Ko-wei Liu, Vanessa Espinosa, Walburga Croteau, Sourabh  
Dhingra, Amariliz Rivera, Robert A. Cramer, Joshua J. Obar

**Supplemental Table 1. Primers used to construct the CEA10 FLARE strain.**

| <b>Primer name</b> | <b>Sequence (5' → 3')</b>                           |
|--------------------|-----------------------------------------------------|
| <b>RAC2888</b>     | agagtatgCGGcaagtcagcaggtccaggtggaatgttatg           |
| <b>RAC2799</b>     | Gtgatgtctgctcaagcgggta                              |
| <b>RAC4582</b>     | taccccgcttgagcagacatcacatgactggcggcaaatctggtgg      |
| <b>RAC4583</b>     | ggctccagcgcctgcaccagctcccagctcctggctgcccttccg       |
| <b>RAC2600</b>     | Ggagctggtgcaggcgtggagcc                             |
| <b>RAC4575</b>     | gcgtttattcttgtgacatgggttaggcgccggtggagtggcggc       |
| <b>RAC2536</b>     | Cccatgtcaacaagaataaaacgc                            |
| <b>RAC2537</b>     | Ccgagtggagatgtggagt                                 |
| <b>RAC1981</b>     | gagcaattggaatccgccctccgccccgagctcccaaatctgtccagatc  |
| <b>RAC4134</b>     | agagcattgtttgaggcaccggttacctgtgcattctgggtaaagactc   |
| <b>RAC3873</b>     | gcagctaactctggcagcacc                               |
| <b>RAC3874</b>     | ggcggagggggcgattccaattgctccgctcacttctcatgctacggacac |
| <b>RAC3875</b>     | cgcacagtgccctcctcagacagtgaggctggggttcgtc            |
| <b>RAC3876</b>     | gttctgccctggatcgctagg                               |
| <b>RAC2055</b>     | accggtcgcctcaacaatgctct                             |
| <b>RAC2056</b>     | gtctgagaggaggcactgatgcg                             |
| <b>RAC3877</b>     | gacgccggttctctgggtaac                               |
| <b>RAC3878</b>     | cacgggataacctgcaataggcg                             |

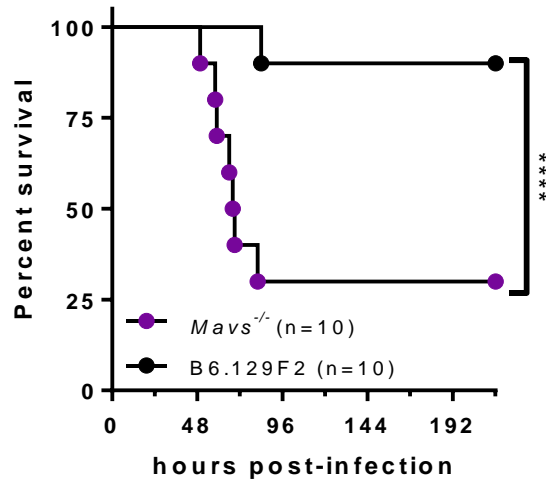

**Supplemental Figure 1.** *Mavs*-dependent responses are essential for host resistance against the Af293 strain of *Aspergillus fumigatus*. *Mavs*<sup>-/-</sup> and B6.129F2 mice were challenged i.t. with  $4 \times 10^7$  resting conidia of the Af293 isolate of *Aspergillus fumigatus*. Survival analysis in immune-competent wild-type and knock-out mice were tracked over the first 9 days. \*\*\*\*,  $P < 0.0001$  by Mantel-Cox log rank test.

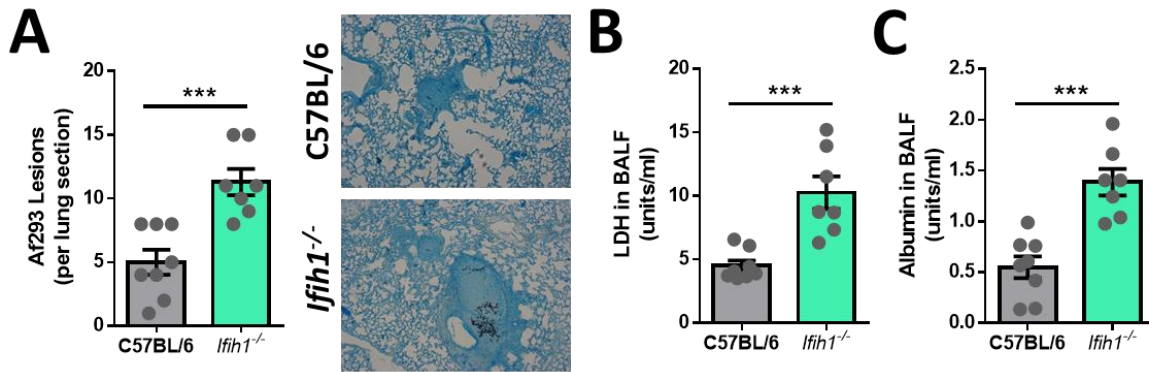

**Supplemental Figure 2. Mda5-dependent responses are essential for host resistance against invasive aspergillosis in corticosteroid immunosuppressed mice.** Mice were treated with 40 mg/kg of Kenalog given s.c. on one day prior to and 4 days after challenge i.t. with  $10^6$  resting conidia of the Af293 strain of *A. fumigatus*. At 72 h post-inoculation lungs were collected for histological analysis for fungal growth (A). BALF was also collected at 72 h post-inoculation to assess LDH activity as a proxy for lung damage (B) and albumin as a proxy for lung leakage (C). Mann-Whitney U-test was used for statistical analysis.

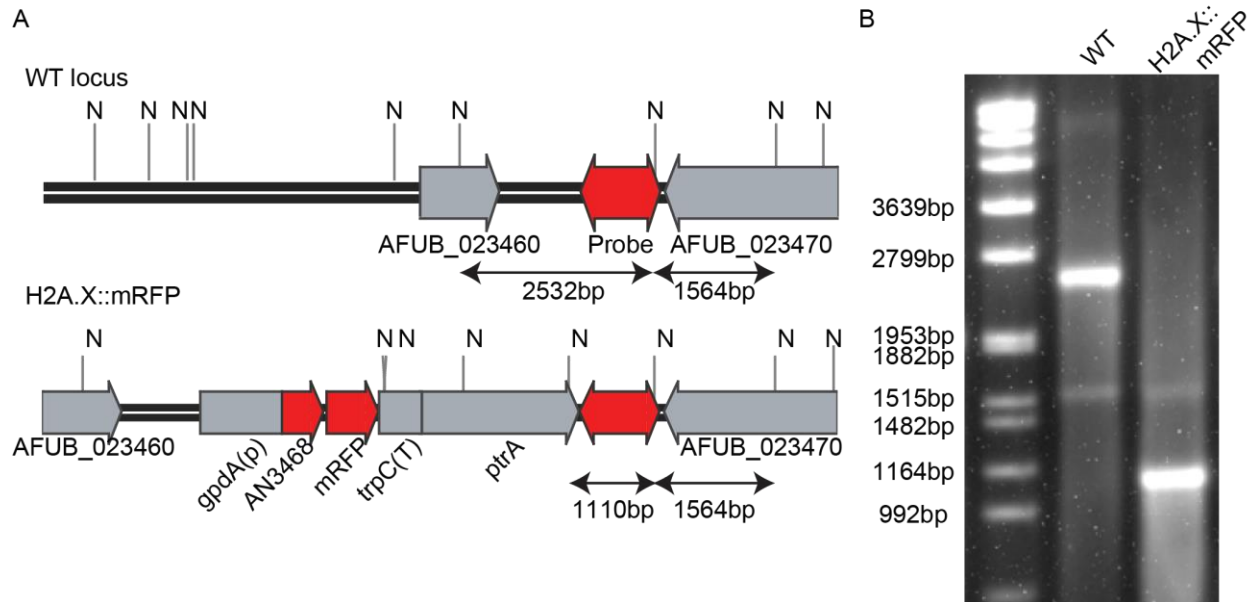

**Supplemental Figure 3. DNA analysis for confirmation of CEA10 H2A.X::mRFP strain. (A)**

Schematic representation showing the intergenic distance between AFUB\_023460 and AFUB\_023470. H2A.X (AN3468) from *A. nidulans* was fused with *gpdA(P)*, *trpC(T)* and *ptrA* gene conferring resistance to pyrithiamine as described in materials and methods. The DNA fragment used as probe and the expected DNA hybridization patterns for southern blot analysis are shown. **(B)** Southern blot analysis of CEA10 WT and H2AX:mRFP strain. NsiI digested DNA of each strain was hybridized with the probe as shown in A. N – NsiI restriction site.
